# Supplementary material for: Job Burnout and Occupational Stressors among Chinese Healthcare Professionals at County-Level Health Alliances
Source: MDPI journal article supplement (doi:10.3390/ijerph17061848), 2020-03-12
Supplement: s1 [file s1]

Supplemental Table S1 The Chinese version of “Scale for occupational stressors on clinicians”.

|    |                                                                                                            | Very<br>inconsistent | Somewhat<br>inconsistent | Somewhat<br>consistent | Very<br>consistent |
|----|------------------------------------------------------------------------------------------------------------|----------------------|--------------------------|------------------------|--------------------|
| 1  | Heavy workload and few breaks.                                                                             |                      |                          |                        |                    |
| 2  | Promotion is slow or has little opportunity for advancement.                                               |                      |                          |                        |                    |
| 3  | I always feel that I do not have time to accompany family and do what I want to do.                        |                      |                          |                        |                    |
| 4  | Personal schedule was often affected by unexpected situations such as changes in patient's condition, etc. |                      |                          |                        |                    |
| 5  | I really like being a doctor.                                                                              |                      |                          |                        |                    |
| 6  | Less space for personal development.                                                                       |                      |                          |                        |                    |
| 7  | Overtime is often required on holidays or weekends.                                                        |                      |                          |                        |                    |
| 8  | I am still willing to work in my current unit If I have to choose again.                                   |                      |                          |                        |                    |
| 9  | Functional department is inefficient.                                                                      |                      |                          |                        |                    |
| 10 | Taking a lot of risk at work.                                                                              |                      |                          |                        |                    |
| 11 | Currently, there are too many negative reports related to medical staff in the media.                      |                      |                          |                        |                    |
| 12 | There were difficulties to communicate with co-workers.                                                    |                      |                          |                        |                    |
| 13 | Working conditions are very satisfying.                                                                    |                      |                          |                        |                    |
| 14 | It is difficult to satisfy patients and their families even if you work hard.                              |                      |                          |                        |                    |
| 15 | Unreasonable and demanding requirements from patients or family members are often encountered.             |                      |                          |                        |                    |
| 16 | Alienation with colleagues and it is difficult to integrate with each other.                               |                      |                          |                        |                    |
| 17 | Rarely get support and help when faced with work difficulties.                                             |                      |                          |                        |                    |
| 18 | I am very interested in my job.                                                                            |                      |                          |                        |                    |
| 19 | It is difficult to get new knowledge and skills at work                                                    |                      |                          |                        |                    |
| 20 | Work performance is difficult to be recognized.                                                            |                      |                          |                        |                    |
| 21 | I can't make full use of my abilities at work.                                                             |                      |                          |                        |                    |
| 22 | I am satisfied with the work arrangement of the leader.                                                    |                      |                          |                        |                    |
| 23 | The relevant employment system of the technical title of the unit is not reasonable.                       |                      |                          |                        |                    |
| 24 | I'm willing to continue my current job even if I                                                           |                      |                          |                        |                    |

|    |                                                                                                                                    |  |  |  |  |
|----|------------------------------------------------------------------------------------------------------------------------------------|--|--|--|--|
|    | don't run out of money.                                                                                                            |  |  |  |  |
| 25 | The workplace has unreasonable policies, regulations and procedures.                                                               |  |  |  |  |
| 26 | It is difficult to get the understanding and respect from patients and their families.                                             |  |  |  |  |
| 27 | The workplace lacks effective incentive policies.                                                                                  |  |  |  |  |
| 28 | I feel that my salary is far lower than what I have devoted.                                                                       |  |  |  |  |
| 29 | I rarely get training or instruction.                                                                                              |  |  |  |  |
| 30 | Being satisfied with the current professional and social status.                                                                   |  |  |  |  |
| 31 | Lack of belonging to the workplace.                                                                                                |  |  |  |  |
| 32 | I rarely involved in the development of organizational systems.                                                                    |  |  |  |  |
| 33 | Most colleagues are unfriendly.                                                                                                    |  |  |  |  |
| 34 | Lack of an effective vacation system.                                                                                              |  |  |  |  |
| 35 | I often work night shifts.                                                                                                         |  |  |  |  |
| 36 | I think the current laws and regulations are difficult to protect the legitimate rights and interests of healthcare professionals. |  |  |  |  |
| 37 | It is very difficult to get a practical appointment even if I work hard to obtain a higher level of job title.                     |  |  |  |  |
| 38 | I think the current healthcare systems need to be improved                                                                         |  |  |  |  |

Supplemental Table S2 Details of items in each domain

| No. | Domains                     | Number of items                                                                            |
|-----|-----------------------------|--------------------------------------------------------------------------------------------|
| 1   | Organization and management | 9,23,25,27,28,32,34,37                                                                     |
| 2   | Vocational interest         | 5,8,13,18,22,24,30 (Reverse scoring for The first seven items require reverse scoring), 31 |
| 3   | Workload                    | 1,3,4,7,10,35                                                                              |
| 4   | Career development          | 2,6,17,19,20,21,29                                                                         |
| 5   | Interpersonal relationship  | 12,16,33                                                                                   |
| 6   | External environment        | 11,36,38                                                                                   |
| 7   | Doctor–patient relationship | 14,15,26                                                                                   |
